# Supplementary material
Source: PubMed Central journal article supplement (PMC2836623)
Supplement: 0910267107_pnas.0910267107_SI.pdf [file 0910267107_pnas.0910267107_SI.pdf]

# Supporting Information

An et al. 10.1073/pnas.0910267107

## SI Text

**Materials and Methods. Mice, surface-spread chromosomes, and immunostaining.** Surface-spread chromosomes from UBR2<sup>-/-</sup> (1) *Brca1*<sup>Δ11/Δ11</sup>*p53*<sup>+/-</sup> (2) mice were used for immunohistochemistry with antibodies listed in Table S1.

**Quantitative RT-PCR.** Quantitative RT-PCR. Total RNA was isolated from +/+ and UBR2<sup>-/-</sup> testes at 4 weeks of age using RNeasy Protect Midi Kit (Qiagen) after DNase treatment to prevent genomic DNA contamination. Approximately 2 μg of total RNA was subjected to reverse-transcription reactions using SuperScript III reverse transcriptase (Invitrogen) and oligo-dT primers. Quantitative PCR was performed in duplicates using Platinum SYBR Green (Invitrogen) with ABI 7300/7500 real time PCR system and primer sequences listed in Table S2. β-actin was used as a control to normalize the data.

**Fluorescence in situ hybridization.** FITC-labeled Y chromosome probe and Cy3-labeled X chromosome probes from Cambio (Cambridge, UK) were used for FISH according to the manufacturer's instruction. After FISH, X–Y painted slides were fixed in 4% paraformaldehyde for 5 min at 4 °C and rinsed in PBS, followed by immunostaining for SCP3.

**Purification of endogenous UBR2.** Endogenous UBR2 was partially purified from extracts prepared from rat or mouse testes using synthetic degrons essentially as described (3), with major modifications. Briefly, a pair of C-terminally biotin-conjugated peptides (X-Ile-Phe-Ser-Thr-Ile-Glu-Gly-Arg-Thr-Tyr-Lys), bearing either N-terminal Phe (type-2 destabilizing) or Val (stabilizing), were synthesized and immobilized on streptavidin-sepharose beads (GE Healthcare) to a ratio of 1:1.5 μmol peptides per 1 mL beads. The residues 2–9 of X-peptides were derived from residues 2–9 of Sindbis virus polymerase nsP4, which is degraded through the N-end rule pathway (3). X-peptide-beads were used

as an affinity ligand to purify N-recognins at low salt concentrations (75–150 mM NaCl) coupled with other procedures not described in detail here (Y.H.J. and Y.T.K., unpublished data). Immobilized E3s were eluted with 10 mM Trp-Ala, followed by dialysis at 0.1 M NaCl and 10 mM HEPES (pH 7.9) and concentration using Amicon Ultra (Millipore).

**In vitro ubiquitination assay.** Partially purified endogenous UBR2 (100 ng per 20 μL reaction) was incubated with 1 μg purified histone H2A (New England Biolabs) or 5 μg chicken oligonucleosome in the presence of 30 ng purified human UbcH2/HR6B (Biomol), 100 ng human recombinant E1 (Biomol), 1 μg Ub tagged with ha or FLAG (Boston Biochem), and 5 mM Mg-ATP for 60–90 min at 37 °C. Proteins were separated by SDS-PAGE and subjected to immunoblotting for uH2A, H2A, UBR2, or HA.

**Ubiquitination-coupled E3 binding assay.** Endogenous N-recognins immobilized on Phe-peptide-beads were mixed with HR6B (Boston Biochem) or H2A (New England Biolabs) in the presence or absence of E1 and Ub activating reagents, followed by incubation at 37 °C for 1 hr. Bound proteins were washed three times with washing buffer (20 mM HEPES, pH 7.9, 150 mM NaCl, and 0.05% Tween20), separated by 4–20% gradient SDS-PAGE, and subjected to immunoblotting.

**GST-pulldown assay.** In a reaction of 300 μL, E3-F (equivalent to 250 ng UBR2) was mixed with 200 ng of GST-HR6B (Boston Biochem) immobilized on GST-beads and/or 1 μg H2A (BioLabs) in the presence or absence of E1 and Ub activating reagents, followed by incubation at 37 °C for 1 hr. Proteins bound to GST-HR6B were washed three times with phosphate buffered saline containing 0.5% Triton X-100 and separated by 4–20% gradient SDS-PAGE, followed by immunoblotting.

1. Kwon YT, et al. (2003) Female lethality and apoptosis of spermatocytes in mice lacking the UBR2 ubiquitin ligase of the N-end rule pathway *Mol Cell Biol* 23:8255–8271.
2. Xu X, Aprelikova O, Moens P, Deng CX, Furth PA (2003) Impaired meiotic DNA-damage repair and lack of crossing-over during spermatogenesis in BCRA1 full-length isoform deficient mice. *Development* 130:2001–2012.

3. Tasaki T, et al. (2005) A family of mammalian E3 ubiquitin ligases that contain the UBR box motif and recognize N-degrons. *Mol Cell Biol* 25:7120–7136.
